# Supplementary material
Source: Springer Nature journal article supplement (https://www.springermedizin.de/resource/supplementary/13058_2013_3261_MOESM4_ESM.pdf/9703714)
Supplement: MOESM4 [file 9703714]

**Physiological  
Environment**

**Physical  
Environment**

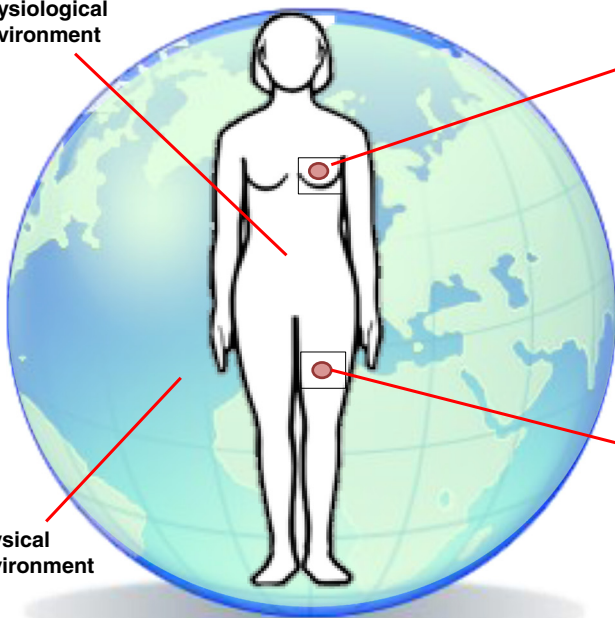

**Tumour-stroma  
host cells**

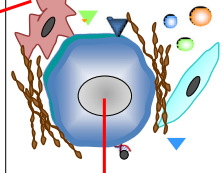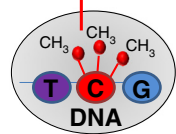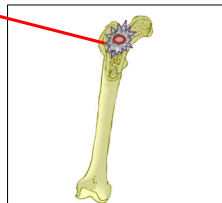

**Metastatic niches**
